# Supplementary material
Source: MDPI journal article supplement (https://www.mdpi.com/2073-4395/13/6/1533)
Supplement: s1 [file s1 › agronomy-2268962-supplementary.pdf]

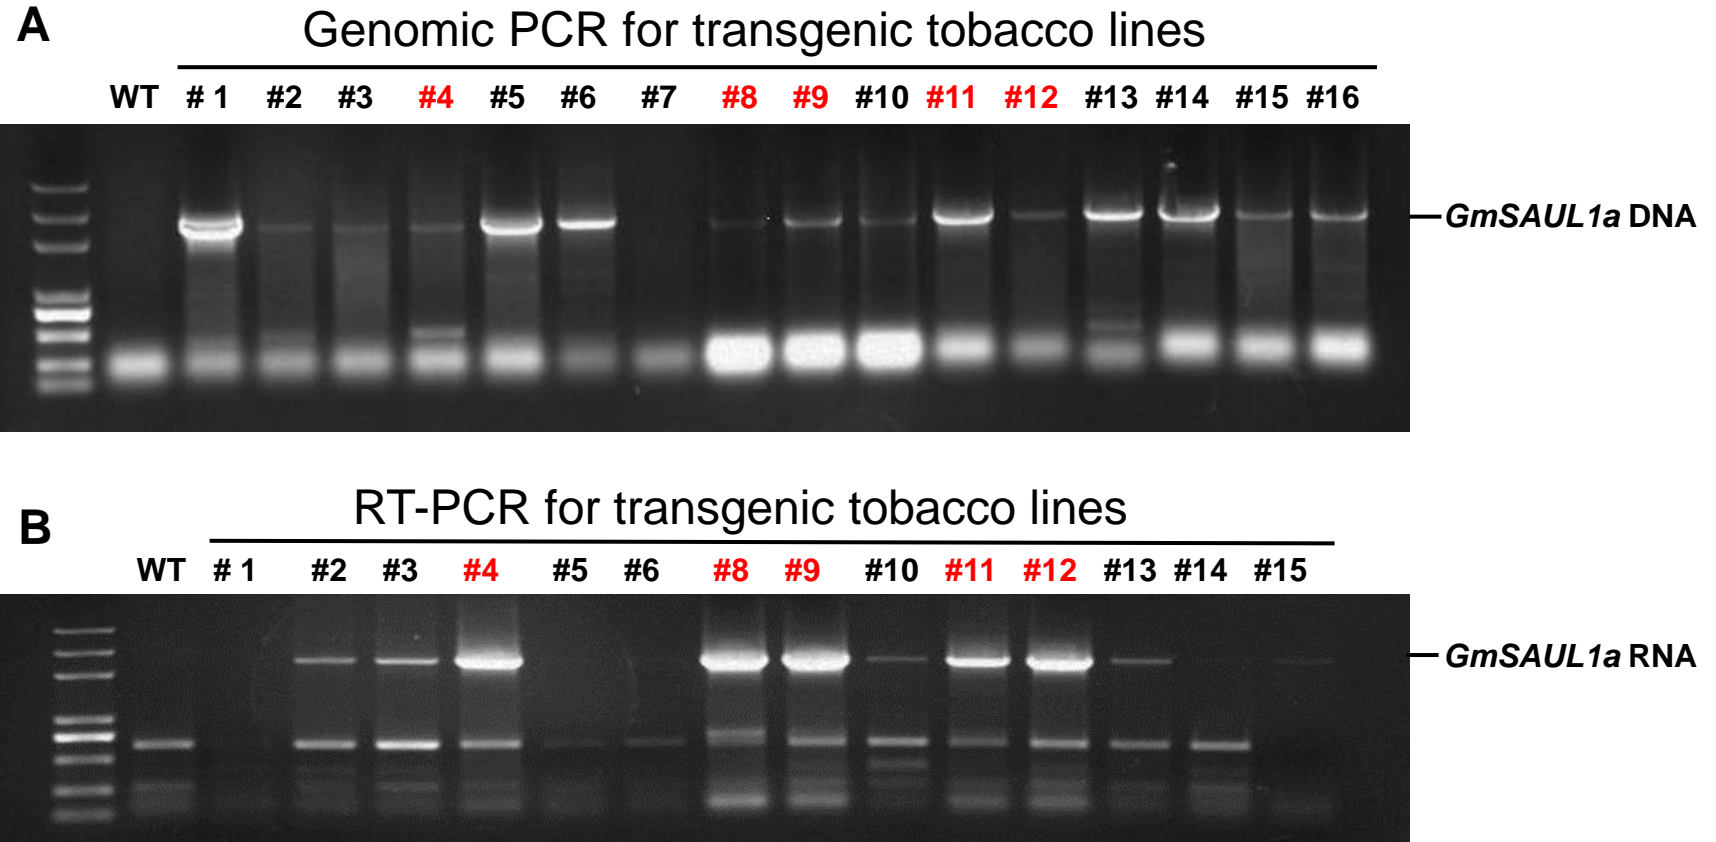

**Figure S1. Screening of transgenic tobacco lines that ectopically expressing *GmSAUL1*.** (A) Genomic PCRs were performed using the genomic DNA samples extracted from different transgenic tobacco lines as templates and the primers that can amplify the full length cDNA; (B) RT-PCRs were performed using the cDNAs transcribed from the RNA samples extracted from the transgenic tobacco lines. The same pair of full length cDNA primers used. The transgenic lines labeled in red were used in subsequent studies.

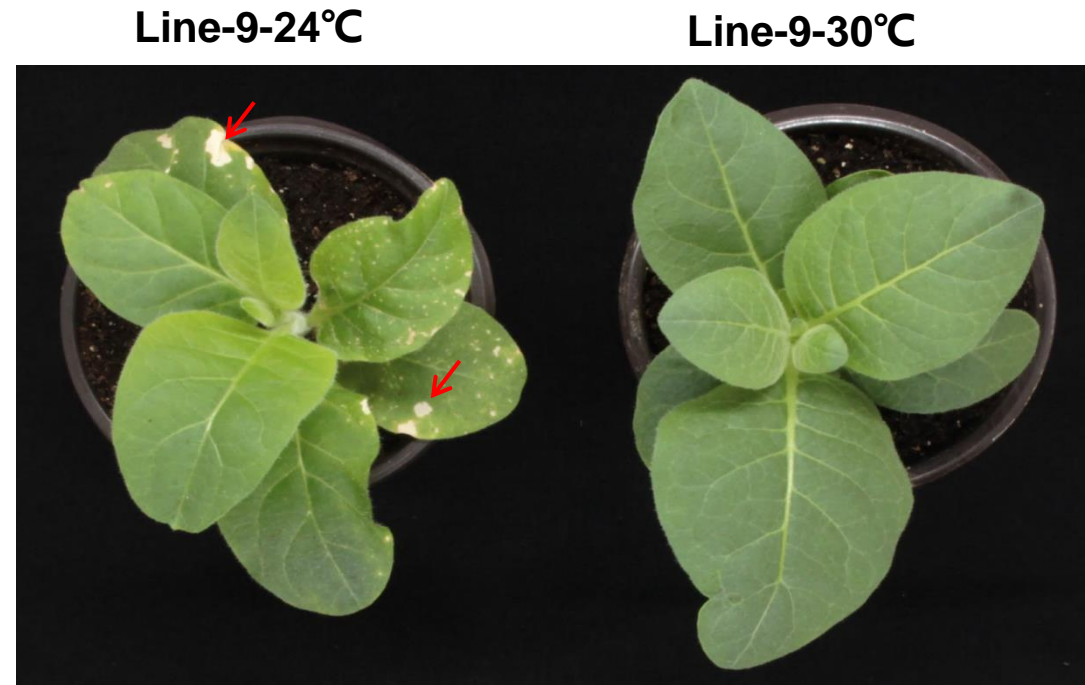

**Figure S2. The cell death phenotype of the *GmSAUL1a*-overexpressing tobacco line is suppressed at 30 °C.** The cell death was pointed by red arrows. The tobacco seedling were grown in a growth room with a photoperiod of 16h-light/8-h dark and a temperature of 25 °C. 25 days later, these plants were randomly divided into two groups. One group of plants were kept in the original conditions, the other group of plants were transferred to a growth chamber with a photoperiod of 16h-light/8-h dark and a temperature of 30 °C. The photo was taken at 7 days after transfer.
